# Supplementary material for: What’s in a Meow? A Study on Human Classification and Interpretation of Domestic Cat Vocalizations
Source: Animals (Basel). 2020 Dec 14;10(12):2390. doi: 10.3390/ani10122390 (PMC7765146; doi:10.3390/ani10122390)
Supplement: Supplementary file 1 [file animals-10-02390-s001.pdf]

# What's in a "meow": investigating cat-human communication

## Informazioni generali:

### 1. Genere:

☐ Femmina ☐ Maschio

### 2. Età:.....

### 3. Stato civile

1. Coniugata/o
2. Divorziata/o – Separata/o
3. Non sposata/o
4. Vedova/o

### 4. Ha dei figli: ☐ Sì ☐ No

### 5. Grado di istruzione raggiunto:

1. Diploma scuola media superiore ☐ Liceo ☐ Istituto tecnico ☐ Istituto professionale
2. Laurea in .....
3. Formazione Post-Universitaria: .....

### 6. Professione/attività di lavoro: .....

### 7. E' cresciuto con animali domestici in casa? ☐ Sì ☐ No

#### 7a. Se Sì, che tipo di animali domestici?.....

### 8. Attualmente ha animali domestici in casa? ☐ Sì ☐ No

#### 8a. Se Sì, che tipo di animali domestici?.....

### **Esperienza e relazione con i gatti:**

**Le domande riportate di seguito Le permettono di descrivere il Suo rapporto con i gatti:**

|                                                  | <b>PER<br/>NULLA/POCA</b> | <b>DISCRETA</b> | <b>MOLTA</b> | <b>MOLTISSIMA</b> |
|--------------------------------------------------|---------------------------|-----------------|--------------|-------------------|
| <b>1. Ha esperienza di vita insieme a gatti?</b> |                           |                 |              |                   |

|                                                  | <b>PER<br/>NULLA/POCA</b> | <b>ABBASTANZA</b> | <b>SPESSO</b> | <b>SEMPRE</b> |
|--------------------------------------------------|---------------------------|-------------------|---------------|---------------|
| <b>2. Quanto spesso interagisce con i gatti?</b> |                           |                   |               |               |

|                                              | <b>PER<br/>NULLA/POCA</b> | <b>DISCRETA</b> | <b>MOLTA</b> | <b>MOLTISSIMA</b> |
|----------------------------------------------|---------------------------|-----------------|--------------|-------------------|
| <b>3. Quanta affinità prova per i gatti?</b> |                           |                 |              |                   |

## AES (Paul, 2000)

| 1                                                                                                               | 2             | 3                           | 4                         | 5        | 6                     | 7                                 | 8         | 9               |
|-----------------------------------------------------------------------------------------------------------------|---------------|-----------------------------|---------------------------|----------|-----------------------|-----------------------------------|-----------|-----------------|
| Molto in disaccordo                                                                                             | In disaccordo | Moderatamente in disaccordo | Leggermente in disaccordo | Indeciso | Leggermente d'accordo | Moderatamente d'accordo           | D'accordo | Molto d'accordo |
| 1. Non penso che agli animali dello zoo, se sono ben gestiti e ben nutriti, dispiaccia essere tenuti in gabbia. |               |                             |                           |          |                       | 1 – 2 – 3 – 4 – 5 – 6 – 7 – 8 – 9 |           |                 |
| 2. Spesso i gatti miagolano e ci infastidiscono per ottenere cibo senza essere davvero affamati.                |               |                             |                           |          |                       | 1 – 2 – 3 – 4 – 5 – 6 – 7 – 8 – 9 |           |                 |
| 3. Mi dispiace vedere, nei programmi televisivi sulla fauna selvatica, animali inseguiti e uccisi dai leoni.    |               |                             |                           |          |                       | 1 – 2 – 3 – 4 – 5 – 6 – 7 – 8 – 9 |           |                 |
| 4. I cani che ululano e abbaiano quando vengono lasciati da soli mi infastidiscono.                             |               |                             |                           |          |                       | 1 – 2 – 3 – 4 – 5 – 6 – 7 – 8 – 9 |           |                 |
| 5. I film tristi sugli animali mi lasciano spesso con un groppo in gola.                                        |               |                             |                           |          |                       | 1 – 2 – 3 – 4 – 5 – 6 – 7 – 8 – 9 |           |                 |
| 6. Gli animali meritano di essere rimproverati quando non si comportano bene.                                   |               |                             |                           |          |                       | 1 – 2 – 3 – 4 – 5 – 6 – 7 – 8 – 9 |           |                 |
| 7. Vedere un animale da solo in gabbia mi rende triste.                                                         |               |                             |                           |          |                       | 1 – 2 – 3 – 4 – 5 – 6 – 7 – 8 – 9 |           |                 |
| 8. Le persone che coccolano e baciano i loro animali domestici in pubblico mi infastidiscono.                   |               |                             |                           |          |                       | 1 – 2 – 3 – 4 – 5 – 6 – 7 – 8 – 9 |           |                 |
| 9. Un gatto amichevole che fa le fusa di solito mi mette allegria.                                              |               |                             |                           |          |                       | 1 – 2 – 3 – 4 – 5 – 6 – 7 – 8 – 9 |           |                 |
| 10. Mi dispiace vedere animali anziani e vulnerabili.                                                           |               |                             |                           |          |                       | 1 – 2 – 3 – 4 – 5 – 6 – 7 – 8 – 9 |           |                 |
| 11. A volte i cani guaiscono e piagnucolano senza un reale motivo.                                              |               |                             |                           |          |                       | 1 – 2 – 3 – 4 – 5 – 6 – 7 – 8 – 9 |           |                 |
| 12. Molte persone sono eccessivamente affezionate ai loro animali domestici.                                    |               |                             |                           |          |                       | 1 – 2 – 3 – 4 – 5 – 6 – 7 – 8 – 9 |           |                 |
| 13. Mi arrabbio molto quando vedo maltrattare gli animali.                                                      |               |                             |                           |          |                       | 1 – 2 – 3 – 4 – 5 – 6 – 7 – 8 – 9 |           |                 |
| 14. Affezionarsi troppo ad un animale domestico è sciocco.                                                      |               |                             |                           |          |                       | 1 – 2 – 3 – 4 – 5 – 6 – 7 – 8 – 9 |           |                 |

- |                                                                                                                      |                                   |
|----------------------------------------------------------------------------------------------------------------------|-----------------------------------|
| 15. Gli animali domestici hanno un'influenza molto positiva sul mio umore.                                           | 1 – 2 – 3 – 4 – 5 – 6 – 7 – 8 – 9 |
| 16. Talvolta mi stupisce vedere quanto alcune persone rimangano sconvolte dalla morte del proprio animale domestico. | 1 – 2 – 3 – 4 – 5 – 6 – 7 – 8 – 9 |
| 17. Mi fa piacere dare da mangiare agli uccelli briciole di cibo.                                                    | 1 – 2 – 3 – 4 – 5 – 6 – 7 – 8 – 9 |
| 18. Mi addolora vedere animali sofferenti.                                                                           | 1 – 2 – 3 – 4 – 5 – 6 – 7 – 8 – 9 |
| 19. Spesso le persone danno troppa importanza a sentimenti e sensibilità degli animali.                              | 1 – 2 – 3 – 4 – 5 – 6 – 7 – 8 – 9 |
| 20. E' irritante quando i cani tentano di accogliermi saltandomi addosso e leccandomi.                               | 1 – 2 – 3 – 4 – 5 – 6 – 7 – 8 – 9 |
| 21. Se vedessi un cane o un cucciolo che sembra essersi smarrito cercherei sempre di aiutarlo.                       | 1 – 2 – 3 – 4 – 5 – 6 – 7 – 8 – 9 |
| 22. Odio vedere gli uccelli chiusi in gabbie in cui non c'è alcuno spazio per svolazzare.                            | 1 – 2 – 3 – 4 – 5 – 6 – 7 – 8 – 9 |
| 23. Trovo difficile vedere le situazioni dal punto di vista di un gatto.                                             | 1 – 2 – 3 – 4 – 5 – 6 – 7 – 8 – 9 |
| 24. Capisco con facilità se un gatto vuole comunicare con me.                                                        | 1 – 2 – 3 – 4 – 5 – 6 – 7 – 8 – 9 |
| 25. Riesco a capire rapidamente e intuitivamente come si sente un gatto.                                             | 1 – 2 – 3 – 4 – 5 – 6 – 7 – 8 – 9 |
| 26. Sono bravo a predire quello che un gatto farà.                                                                   | 1 – 2 – 3 – 4 – 5 – 6 – 7 – 8 – 9 |

La ringraziamo per la collaborazione!
